# Supplementary material
Source: bioRxiv or medRxiv preprint supplement (https://medrxiv.org/highwire/filestream/83445/field_highwire_adjunct_files/0/2020.05.26.20113167-1.pdf)
Supplement: Supplementary file [file 2020.05.26.20113167-1.pdf]

**A pilot study to investigate the fecal dissemination of SARS-CoV-2 virus genome in COVID-19 patients in Odisha, India**

**Supplimentary Information**

**Other members of Odisha Covid-19 Study Group**

| <b>Name</b>               | <b>Institution</b>    | <b>Designation</b>                                                |
|---------------------------|-----------------------|-------------------------------------------------------------------|
| Dr. Srikanta Kanungo      | ICMR RMRC Bhubaneswar | Scientist-C (Public Health)                                       |
| Dr. Subrata Kumar Palo    | ICMR RMRC Bhubaneswar | Scientist-D (Medical)                                             |
| Dr. Debdutta Bhattacharya | ICMR RMRC Bhubaneswar | Scientist-D (Microbiology)                                        |
| Dr. Dasarathi Das         | ICMR RMRC Bhubaneswar | Scientist-F                                                       |
| Dr. Binod Kumar Patro     | AIIMS, Bhubaneswar    | Additional Professor, Department of Community and Family Medicine |
| Dr. Arvind Kumar Singh    | AIIMS, Bhubaneswar    | Associate Professor, Department of Community and Family Medicine  |
| Dr. Baijayantimala Mishra | AIIMS, Bhubaneswar    | Professor and Head, Department of Microbiology                    |
| Dr. Durgesh Prasad Sahoo  | AIIMS Bhubaneswar     | Senior Resident, Department of Community and Family Medicine      |
| Dr. Somen Kumar Pradhan   | AIIMS Bhubaneswar     | Senior Resident, Department of Community and Family Medicine      |
| Dr. Dinesh Prasad Sahu    | AIIMS Bhubaneswar     | Senior Resident, Department of Community and Family Medicine      |
| Dr. Rupesh Das            | ILS, Bhubaneswar      | Scientist-E                                                       |
| Dr. Rajeeb K. Swain       | ILS, Bhubaneswar      | Scientist-E                                                       |
| Dr. Sunil K. Raghav       | ILS, Bhubaneswar      | Scientist-E                                                       |
| Prof. Jayanta Panda       | SCB Medical College   | Professor, Department of Medicine                                 |

|                              |                                                    |                                                                           |
|------------------------------|----------------------------------------------------|---------------------------------------------------------------------------|
| Prof. Nirupama Chaini        | SCB Medical College                                | Prof. & Head, Department of Microbiology                                  |
| Dr. Dharitri Mohapatra       | SCB Medical College                                | Asso. Prof, Department of Microbiology                                    |
| Dr. Roma Rattan              | SCB Medical College                                | Associate professor, Department of Biochemistry                           |
| Dr Sriprasad Mohanty         | SCB Medical College                                | Associate Professor, Department of Medicine                               |
| Prof. Durga Madhab Satapathy | MKCG Medical College                               | Prof. & Head, Department of Community Medicine                            |
| Dr. Dhaneswari Jena          | MKCG Medical College                               | Associate Prof., Department of Community Medicine                         |
| Dr. Sangeeta Das             | MKCG Medical College                               | Assistant Prof., Department of Community Medicine                         |
| Prof Banajini Parida         | MKCG Medical College                               | Prof. & Head, Department of Microbiology                                  |
| Prof. Sadhu Panda            | VIMSAR                                             | Prof. & Head, Department of Community Medicine                            |
| Dr. Kaushik Mishra           | IDSP Cell, Dept. of Health and FW, Govt. of Odisha | Professor and Head, Department of Community Medicine, SLN Medical College |
| Dr. Manoranjan Satpathy      | IIT, Bhubaneswar                                   | Associate Professor<br>School of Electrical Sciences                      |
| Dr. D. P. Dogra              | IIT, Bhubaneswar                                   | Assistant Professor<br>School of Electrical Sciences                      |
| Ex-Officio                   | Department of Health and Family Welfare            | Director of Public Health                                                 |
| Dr. Deepa Prasad             | UNFPA                                              | Programme Coordinator, Bhubaneswar                                        |
